# Supplementary material
Source: Springer Nature journal article supplement (https://www.springermedizin.de/resource/supplementary/12936_2010_1588_MOESM5_ESM.pdf/9542236)

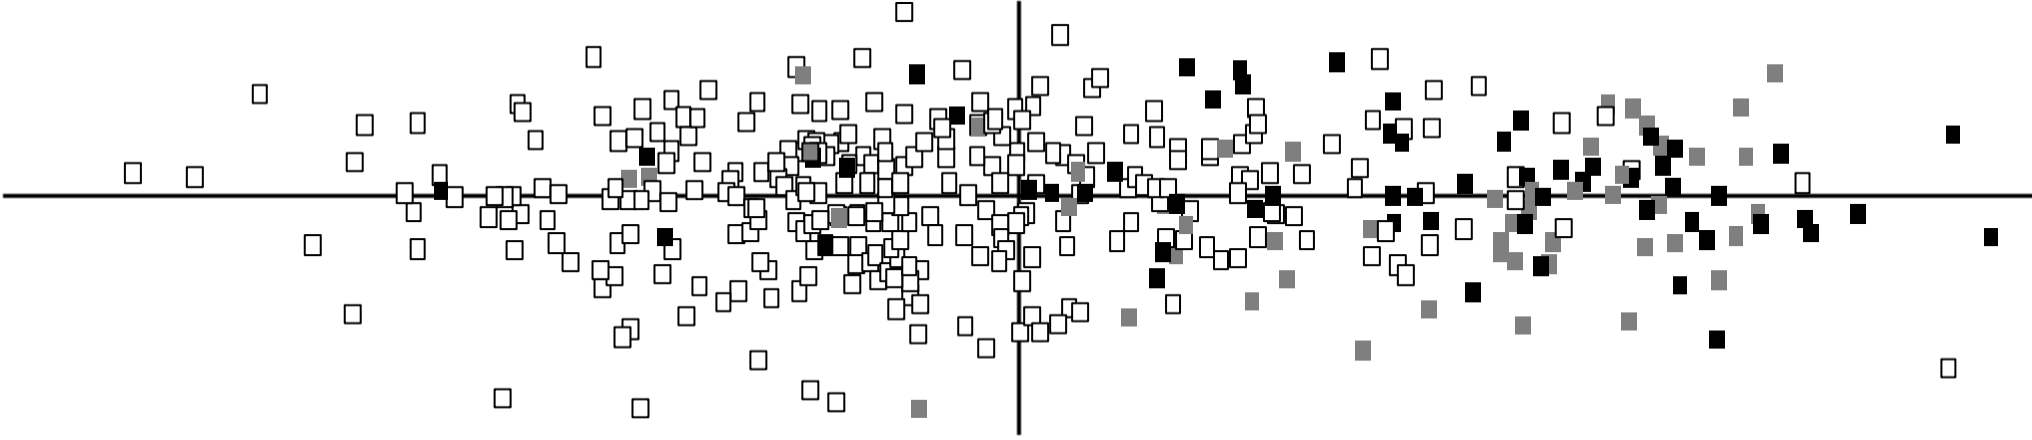

Supplement: MOESM5 [file 9542236]
